# Supplementary material for: Role of interface states associated with transitional nanophase precipitates in the photoluminescence enhancement of SrTiO3∶Pr3+,Al3+
Source: Royal Society of Chemistry journal article supplement (doi:10.1039/b305139k), 2003-01-01
Supplement: b305139k.pdf [file b305139k.pdf]

Role of interface states associated with transitional nanophase precipitates in the photoluminescence enhancement of SrTiO<sub>3</sub>:Pr<sup>3+</sup>,Al<sup>3+</sup>.

T. R. N. Kutty and Abanti Nag

---

**Thermoanalytical studies:**

Fig. S1 shows the simultaneous TG/DTA curves of the gel-carbonate precipitate. TG of the precipitate after heating at 110°C for 24 hours shows that the mass loss occurs in two steps: (i) initial mass loss of about 5% below 200°C due to the resorbed water. This is followed by a near constant mass through the broad range of temperature upto 700°C and (ii) the mass loss of about 15% occurs again through the broad range of temperature from 850 to 1000°C due to the reaction of nanoparticles of SrCO<sub>3</sub> with the TiO<sub>2</sub> xerogel accompanied by the release of CO<sub>2</sub>. Mass loss experiments were also carried out under isothermal conditions by heating the samples for several hours at selected temperatures. After drying at 110°C for extended periods, the residue shows the mass loss of 6% upto 750°C and 15% upto 950°C. Above 950°C, the weight remains almost unchanged, indicating the complete evolution of CO<sub>2</sub> from SrCO<sub>3</sub> + TiO<sub>2</sub> reaction.

The endothermic maximum around 100°C in DTA curve is due to the loss of water resorbed by the oven-dried samples when handled in air. The shift in the baseline of the DTA curve leads to the broad exotherm and is due to partial recrystallization of the xerogel to crystalline TiO<sub>2</sub>. The endotherm around 930°C corresponds to the reaction of SrCO<sub>3</sub> with TiO<sub>2</sub>.

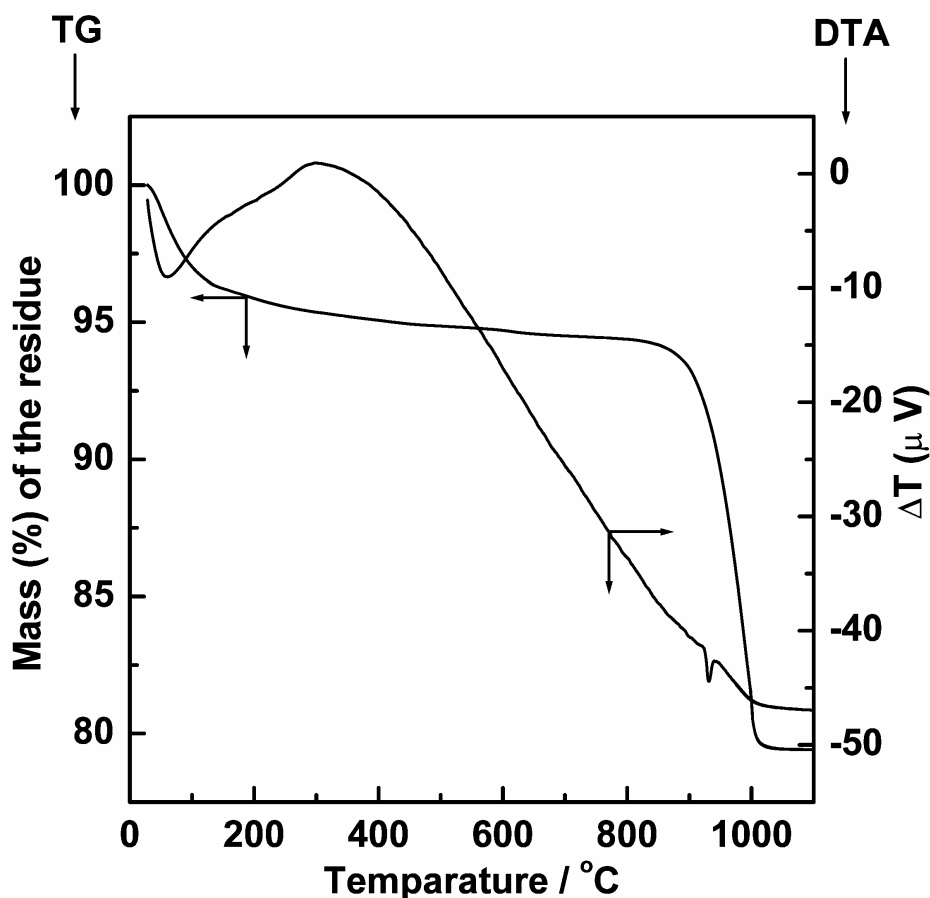

**Fig. S1.** TG-DTA curve of a composite precipitate of  $\text{SrCO}_3$  and hydrated titania in air at a heating rate of  $10^\circ\text{C min}^{-1}$

### X-ray Diffraction analyses

The sequence of reactions during thermal analyses is studied by identifying the intermediate phases under isothermal heating conditions at selected temperatures for several hours using x-ray diffraction (Fig. S2). XRD pattern of the powder dried at  $110^\circ\text{C}$  shows the presence of  $\text{SrCO}_3$  as the only crystalline phase [Fig. S2(a)]. No  $\text{TiO}_2$  is detected since it is in the amorphous form, as xerogel of hydrated titania. Heat treatment of the powder at  $650^\circ\text{C}$  gives only reflections corresponding to  $\text{SrCO}_3$ . On heat treatment at  $750^\circ\text{C}$ ,  $\text{SrTiO}_3$  formation is discernible, whereas no reflection of  $\text{TiO}_2$  is observed [Fig. S2(b)]. As the calcination temperature is increased to  $850^\circ\text{C}$ , reflections corresponding to  $\text{SrTiO}_3$ ,  $\text{Sr}_2\text{TiO}_4$ ,  $\text{TiO}_2$  (rutile)

and  $\text{SrCO}_3$  are observed [Fig. S2(c)]. Heat treatment at  $950^\circ\text{C}$  results in powders containing  $\text{SrTiO}_3$ ,  $\text{Sr}_2\text{TiO}_4$  and  $\text{TiO}_2$  with increased intensities of  $\text{SrTiO}_3$  reflections [Fig. S2(d)]. Further calcination at  $1050^\circ\text{C}$  results in the evolution of the perovskite,  $\text{SrTiO}_3$ , with complete phase purity [Fig. S2(e)].

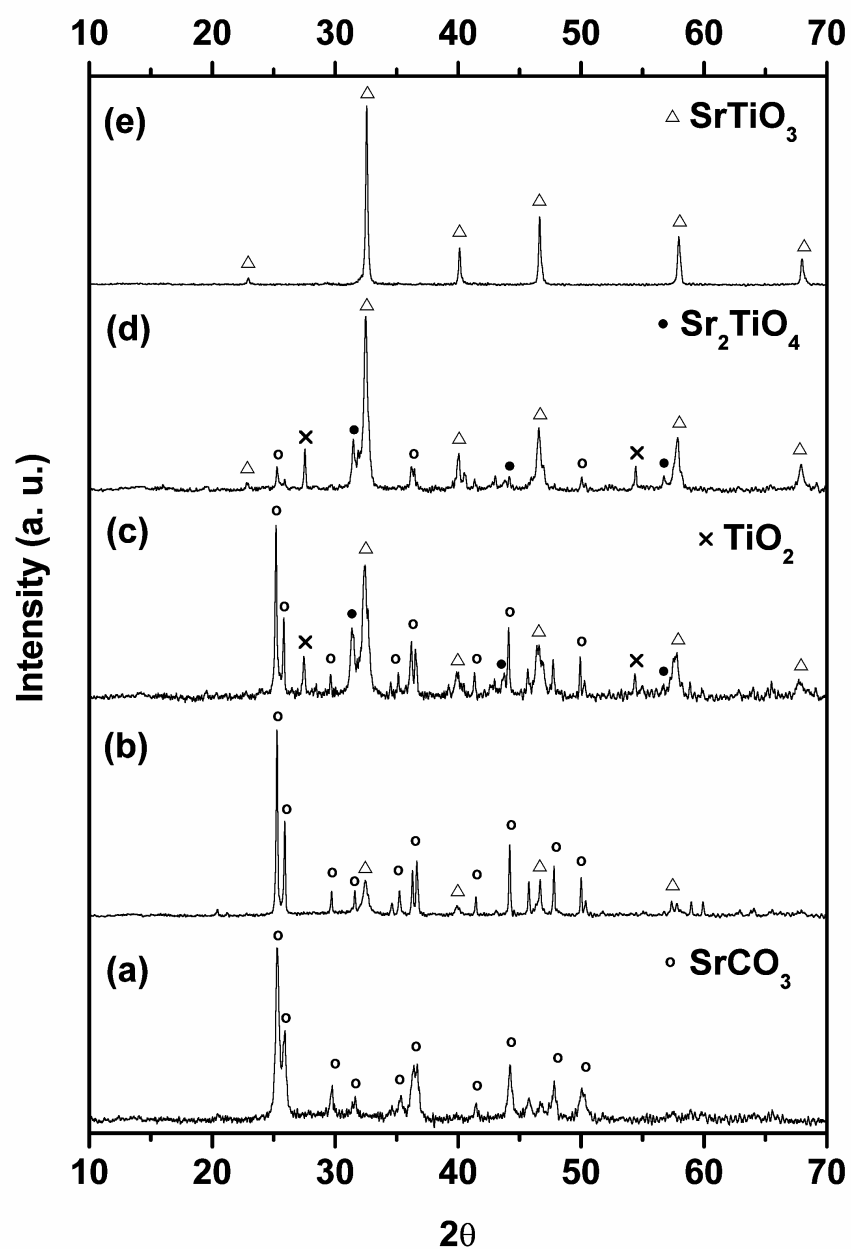

**Fig. S2.** X-ray diffraction patterns of the sample at (a)  $110^\circ\text{C}$ , (b)  $750^\circ\text{C}$ , (c)  $850^\circ\text{C}$ , (d)  $950^\circ\text{C}$  and (e)  $1050^\circ\text{C}$  show the evolution of crystalline  $\text{SrTiO}_3$  from the composite powder.

## Reactions involved during the course of gel-carbonate preparation

The precipitation method described in this paper gives rise to composite powders wherein nanometer sized particles of strontium carbonate crystallites are embedded within the amorphous gels of hydrated titanium oxide. The carbonates of titanium are not formed, as they are unstable. Since aluminium hydroxide gel has the same chemical behavior as of titania gel (i.e. the corresponding carbonates are unstable) both could be precipitated as hydrated mixed gels. Further, titanium has the tendency to form polymeric chains such as  $(\text{Ti-O-Ti})_n$  in preference to isolated  $\text{Ti}^{4+}$  ions. These polymeric chains of metal hydroxide form entangled network within the gel and thereby the solvent is entrapped. The effective molar volume of this network is very large in comparison to that of strontium carbonate which is formed simultaneously as crystalline fine particles. As a result,  $\text{SrCO}_3$  gets embedded within the polymeric network of the gel. This accounts for the generation of the composite precipitate. During calcination, dehydroxylation of  $\text{TiO}_2 \cdot x\text{H}_2\text{O}$  takes place which, in turn, reacts with  $\text{SrCO}_3$  to yield phase-pure  $\text{SrTiO}_3$  through the formation of the intermediate  $\text{Sr}_2\text{TiO}_4$ . The sequence of reactions occurring during the formation of  $\text{SrTiO}_3$  can be formulated as follows:

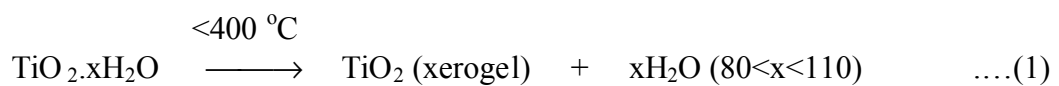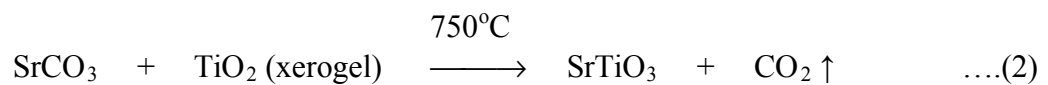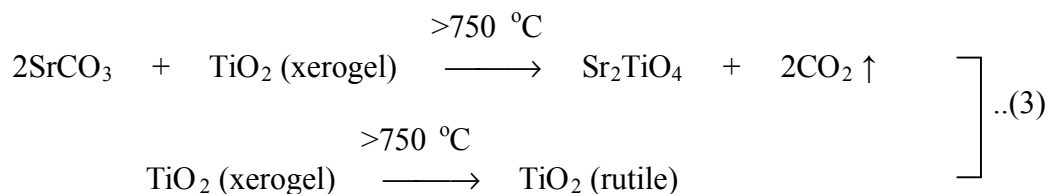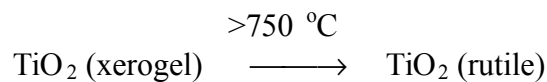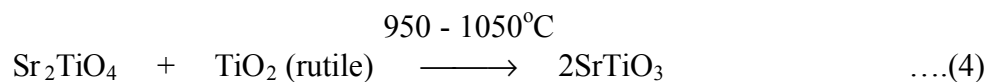

Formation of SrTiO<sub>3</sub> around 750°C from the reaction of the titania xerogel with the carbonate is only partial. This is because of the onset of the parallel reaction of Sr<sub>2</sub>TiO<sub>4</sub> formation. This is accompanied by the conversion of TiO<sub>2</sub> xerogel to the rutile phase. In turn, Sr<sub>2</sub>TiO<sub>4</sub> reacts with rutile to yield phase-pure SrTiO<sub>3</sub>. Therefore, the reaction pathway followed by the composite powders is completely different from those of the products from other wet chemical processes as also of the solid-solid reaction between the binary oxides. The gel-carbonate route yields homogenous, highly reactive powders which produce phase-pure crystalline SrTiO<sub>3</sub> at relatively low temperatures in comparison to the ceramic process. This method also yields Al-containing as well as Ti-excess SrTiO<sub>3</sub> which may prevail metastability because of the specific reaction path mentioned above.
